# Supplementary material for: Incidence of hospital-acquired infections due to carbapenem-resistant Enterobacterales and Pseudomonas aeruginosa in critically ill patients in Italy: a multicentre prospective cohort study
Source: Springer Nature journal article supplement (doi:10.1186/s13054-025-05266-1), 2025-01-17
Supplement: MOESM1 [file 13054_2025_5266_MOESM1_ESM.docx]

**Incidence of hospital-acquired infections due to carbapenem-resistant *Enterobacterales* and *Pseudomonas aeruginosa* in critically ill patients in Italy: A multicentre prospective cohort study**

**Supplementary material**

[**CLINICAL DEFINITION OF SPECIFIC INFECTIONS**](#_Toc161691394)

The sample resulting in patient enrolment must be a clinical sample (i.e. sample obtained in the work-up of a patient with suspicion of infection -not screening or surveillance samples).

- 1. **Bloodstream infection (BSI)**

At least one positive blood culture for a recognised CRE/CRPA pathogen

**i. Catheter-related BSI**

The same microorganism was cultured from the catheter or symptoms improve within 48 hours after removal of the catheter

**ii. BSI secondary to another infection**

The same microorganism was isolated from another infection site or strong clinical evidence exists that BSI was secondary to another infection site, invasive diagnostic procedure or foreign body:

Pulmonary

Urinary tract infection

Digestive tract infection

Surgical site infection

Skin and soft tissue

Other (S-OTH): e.g. central nervous system infection, bone infection (e.g. osteomyelitis, etc.), invasive diagnostic procedure, foreign body

- 1. **Pneumonia**

A combination of radiological, clinical and microbiological criteria is included in the case definition.

*Radiological*

Either chest X-rays or CT-scans

*AND Clinical*

At least one of the following: fever, leukopenia or leucocytosis, and at least one of the following: sputum (new onset or change in character), cough or dyspnea or tachypnea, auscultation findings, or worsening gas exchange.

*AND Microbiology*

according to the used diagnostic method:

Positive culture from lower respiratory tract (BAL, PB (protected brush), OR alternatively: positive blood culture not related to another source of infection, positive growth in culture of pleural fluid, pleural or pulmonary abscess with positive needle aspiration, histologic pulmonary exam showing evidence of pneumonia.

- 1. **Urinary tract infection (UTI)**

Combination of clinical and microbiological criteria

*Clinical criteria:*

Systemic: fever (> 38 °C) or hypothermia, change in mental status,

Local: urgency, frequency, dysuria, suprapubic tenderness, flank pain,

Urinary tract abnormalities or presence of urinary catheter,

AND

*Positive urine culture*

- 1. **Intra-abdominal infection (IAI)**
- **uncomplicated IAI**: the infectious process only involves a single organ and does not spread to the peritoneum
- **complicated IAI**, the infectious process extends beyond a singularly affected organ, and causes either localized peritonitis or diffuse peritonitis.

**e. Acute Bacterial skin and soft tissue infections (ABSSSI):**

An ABSSSI is defined as a bacterial infection of the skin with a lesion size area of at least 75 cm2* (lesion size measured by the area of redness, edema, or induration).

- Cellulitis/erysipelas: A diffuse skin infection characterized by spreading areas of redness, edema, and/or induration
- Wound infection: An infection characterized by purulent drainage from a wound with surrounding redness, edema, and/or induration
- Major cutaneous abscess: An infection characterized by a collection of pus within the dermis or deeper that is accompanied by redness, edema, and/or induration

* An area smaller than 75cm2 can be accepted if the ABSSSI infection by CRE/CRPA is considered medically significant by the treating physician to necessitate antibiotic treatment.

**f. for the other infections eligible for inclusion (i.e. meningitis, endocarditis, osteomyelitis)**, standard locally used diagnostic criteria should be used, according to the usual clinical practice.

Adapted from:

- - 1. Plachouras D et al. ECDC definitions and methods for the surveillance of healthcare-associated infections in intensive care units. Intensive Care Med. 2018 Dec;44(12):2216-2218, Supplementary material.
    2. Gutiérrez-Gutiérrez B et al. EUropean prospective cohort study on Enterobacteriaceae showing Resistance to CArbapenems EURECA): a protocol of a European multicentre observational study, BMJ Open 2017;7:e015365).
    3. FDA. Guidance for Industry Acute Bacterial Skin and Skin Structure Infections: Developing Drugs for Treatment. October 2013. Available at:https://www.fda.gov/files/Acute-Bacterial-Skin-and-Skin-Structure-Infections---Developing-Drugs-for-Treatment.pdf
    4. Sartelli M et al. Complicated intra-abdominal infections in a worldwide context: an observational prospective study (CIAOW Study). World J Emerg Surg. 2013 Jan 3;8(1):1

**Table S1. Antimicrobial susceptibility test results for 77 KPC-producing *Enterobacterales*a,b**

|  | **MIC50** | | **MIC90** | **MIC range** | **%S** | **%I** | **%R** |
| --- | --- | --- | --- | --- | --- | --- | --- |
| Amoxicillin-clavulanic acid | | ≥32 | ≥32 | ≥32 | 0 | 0 | 100 |
| Piperacillin-tazobactam | | ≥128 | ≥128 | 128 | 0 | 0 | 100 |
| Cefotaxime | | ≥64 | ≥64 | ≥64 | 0 | 0 | 100 |
| Ceftazidime | | ≥64 | ≥64 | ≥64 | 0 | 0 | 100 |
| Ceftazidime-avibactam | | 2 | ≥64 | ≤0.25 to ≥64 | 86 | 0 | 14 |
| Cefepime | | ≥16 | ≥16 | ≥16 | 0 | 0 | 100 |
| Cefiderocol | | - | - | - | 94 | 0 | 6 |
| Ceftolozane-tazobactam | | ≥64 | ≥64 | ≥64 | 0 | 0 | 100 |
| Ertapenem | | >2 | >2 | >2 | 0 | 0 | 100 |
| Imipenem | | ≥16 | ≥16 | ≤0.25 to ≥16 | 16 | 0 | 84 |
| Imipenem-relebactam | | ≤0.25 | 0.5 | ≤0.25 to 2 | 100 | 0 | 0 |
| Meropenem | | ≥64 | ≥64 | ≤0.12 to ≥64 | 16 | 1 | 83 |
| Meropenem-vaborbactam | | 0.5 | 0.5 | ≤0.5 to 8 | 100 | 0 | 0 |
| Aztreonam | | ≥32 | ≥32 | 4 to ≥32 | 0 | 8 | 92 |
| Aztreonam-avibactam | | 0.25 | 0.5 | 0.03 to 1 | 100 | 0 | 0 |
| Amikacin | | ≥32 | ≥32 | ≤4 to ≥32 | 43 | 0 | 57 |
| Gentamicin | | ≥64 | ≥64 | ≤1 to ≥64 | 32 | 0 | 68 |
| Ciprofloxacin | | ≥16 | ≥16 | ≤0.25 to ≥16 | 4 | 0 | 96 |
| Colistin | | 0.5 | ≥16 | ≤0.5 to ≥16 | 71 | 0 | 29 |
| Trimethoprim-sulfamethoxazole | | ≥8 | ≥8 | ≤1 to ≥8 | 36 | 0 | 64 |

*a Includes Escherichia coli* (1) and *Klebsiella pneumoniae* (76 ).

b Includes isolates producing KPC-3 (n=59), KPC-2 (**n=6**), KPC-166 (n=6), KPC-167 (n=5), and KPC-184 (n=1)

MIC=minimum inhibitory concentration; % percentage. S: Susceptible, standard dosing regimen. I, Susceptible, increased exposure. R, Resistant.

**Table S2. Antimicrobial susceptibility testing results for 13 metallo-β-lactamase- producing *Enterobacterales*a**

|  | **MIC50** | **MIC90** | **MIC range** | **%S** | **%I** | **%R** |
| --- | --- | --- | --- | --- | --- | --- |
| Amoxicillin-clavulanic acid | ≥32 | ≥32 | ≥32 | 0 | 0 | 100 |
| Piperacillin-tazobactam | ≥128 | ≥128 | ≥128 | 0 | 0 | 100 |
| Cefotaxime | ≥64 | ≥64 | ≥64 | 0 | 0 | 100 |
| Ceftazidime | ≥64 | ≥64 | ≥64 | 0 | 0 | 100 |
| Ceftazidime-avibactam | ≥64 | ≥64 | ≥64 | 0 | 0 | 100 |
| Cefepime | ≥16 | ≥16 | ≥16 | 0 | 0 | 100 |
| Cefiderocol | - | - | - | 73 | 0 | 27 |
| Ceftolozane-tazobactam | ≥64 | ≥64 | ≥64 | 0 | 0 | 100 |
| Ertapenem | >2 | >2 | 2 | 0 | 0 | 100 |
| Imipenem | ≥16 | ≥16 | ≥16 | 0 | 0 | 100 |
| Imipenem-relebactam | ≥32 | ≥32 | ≥32 | 0 | 0 | 100 |
| Meropenem | ≥64 | ≥64 | 8 to ≥64 | 0 | 9 | 91 |
| Meropenem-vaborbactam | ≥64 | ≥64 | 8 to ≥32 | 9 | 0 | 91 |
| Aztreonam | ≥32 | ≥32 | 4 to ≥32 | 0 | 8 | 92 |
| Aztreonam-avibactam | 0.5 | 1 | 0.03 to 1 | 100 | 0 | 0 |
| Amikacin | 8 | ≥32 | ≤4 to ≥32 | 55 | 0 | 45 |
| Gentamicin | 4 | ≥64 | ≤1 to ≥64 | 45 | 0 | 55 |
| Ciprofloxacin | ≥16 | ≥16 | ≥16 | 0 | 0 | 100 |
| Colistin | 0.5 | ≥16 | ≤0.5 to ≥16 | 82 | 0 | 18 |
| Trimethoprim-sulfamethoxazole | ≥8 | ≥8 | ≤1 to ≥8 | 18 | 0 | 82 |

aIncludes isolates producing NDM-1 (n=8), VIM-1 (n=3), KPC-2 plus VIM-1 (n=1), and KPC-3 plus VIM-1 (n=1).

MIC=minimum inhibitory concentration; % percentage. S: Susceptible, standard dosing regimen. I, Susceptible, increased exposure. R, Resistant
